# Supplementary material for: Education to Improve Understanding of Ethical and Communication Issues Around Disorders of Consciousness
Source: Research Square preprint supplement (doi:10.21203/rs.3.rs-7576977/v1), 2025-10-07
Supplement: Supplementary file 1 [file 1e99e5721fc71023ef89bbd6.pdf]

## Demographics

Please select your gender.

- ☐ Male
- ☐ Female
- ☐  Other
- ☐ Prefer not to say

Please select your program.

- ☐ Transitional Year
- ☐ Preliminary Year
- ☐ Neurology Residency
- ☐ Pediatrics Residency
- ☐ Neurosurgery Residency
- ☐ General Surgery Residency
- ☐ Internal Medicine Residency
- ☐ Emergency Medicine Residency
- ☐ Anesthesiology Residency
- ☐ Pulmonary and Critical Care Fellowship
- ☐ Surgery Critical Care Fellowship

☐  Other

Please select your year.

- ☐ PGY-1
- ☐ PGY-2
- ☐ PGY-3
- ☐ PGY-4
- ☐ PGY-5
- ☐ PGY-6
- ☐  Other

## Simulation Survey

**Question 1:** I am confident in my ability to describe standard kinds of disorders of consciousness and the behavioral differences between them.

|                                 | Strongly disagree     | Somewhat disagree     | Neither agree nor disagree | Somewhat agree        | Strongly agree        |
|---------------------------------|-----------------------|-----------------------|----------------------------|-----------------------|-----------------------|
| Before Attending the Simulation | <input type="radio"/> | <input type="radio"/> | <input type="radio"/>      | <input type="radio"/> | <input type="radio"/> |

|                                | Strongly disagree     | Somewhat disagree     | Neither agree nor disagree | Somewhat agree        | Strongly agree        |
|--------------------------------|-----------------------|-----------------------|----------------------------|-----------------------|-----------------------|
| After Attending the Simulation | <input type="radio"/> | <input type="radio"/> | <input type="radio"/>      | <input type="radio"/> | <input type="radio"/> |

**Question 2:** I am confident in my understanding of the diagnostic error rate, challenges, and fMRI studies detecting covert awareness in some patients believed to be in a vegetative state.

|                                 | Strongly disagree     | Somewhat disagree     | Neither agree nor disagree | Somewhat agree        | Strongly agree        |
|---------------------------------|-----------------------|-----------------------|----------------------------|-----------------------|-----------------------|
| Before Attending the Simulation | <input type="radio"/> | <input type="radio"/> | <input type="radio"/>      | <input type="radio"/> | <input type="radio"/> |
| After Attending the Simulation  | <input type="radio"/> | <input type="radio"/> | <input type="radio"/>      | <input type="radio"/> | <input type="radio"/> |

**Question 3:** I am confident in my understanding of the “window of opportunity” for patients after a severe TBI, the “clinical nihilism” exhibited by some providers, and recent data challenging clinical nihilism for these patients.

|                                 | Strongly disagree     | Somewhat disagree     | Neither agree nor disagree | Somewhat agree        | Strongly agree        |
|---------------------------------|-----------------------|-----------------------|----------------------------|-----------------------|-----------------------|
| Before Attending the Simulation | <input type="radio"/> | <input type="radio"/> | <input type="radio"/>      | <input type="radio"/> | <input type="radio"/> |
| After Attending the Simulation  | <input type="radio"/> | <input type="radio"/> | <input type="radio"/>      | <input type="radio"/> | <input type="radio"/> |

**Question 4:** I am confident in my ability to communicate appropriately with family about disorders of consciousness.

|                                 | Strongly disagree     | Somewhat disagree     | Neither agree nor disagree | Somewhat agree        | Strongly agree        |
|---------------------------------|-----------------------|-----------------------|----------------------------|-----------------------|-----------------------|
| Before Attending the Simulation | <input type="radio"/> | <input type="radio"/> | <input type="radio"/>      | <input type="radio"/> | <input type="radio"/> |
| After Attending the Simulation  | <input type="radio"/> | <input type="radio"/> | <input type="radio"/>      | <input type="radio"/> | <input type="radio"/> |

**Question 5:** I am confident in my ability to communicate appropriately with some patients in a minimally conscious state.

|                                 | Strongly disagree     | Somewhat disagree     | Neither agree nor disagree | Somewhat agree        | Strongly agree        |
|---------------------------------|-----------------------|-----------------------|----------------------------|-----------------------|-----------------------|
| Before Attending the Simulation | <input type="radio"/> | <input type="radio"/> | <input type="radio"/>      | <input type="radio"/> | <input type="radio"/> |

|                                | Strongly disagree     | Somewhat disagree     | Neither agree nor disagree | Somewhat agree        | Strongly agree        |
|--------------------------------|-----------------------|-----------------------|----------------------------|-----------------------|-----------------------|
| After Attending the Simulation | <input type="radio"/> | <input type="radio"/> | <input type="radio"/>      | <input type="radio"/> | <input type="radio"/> |

Please list area(s) for improvement, if needed.

What did you like most about the training?

Powered by Qualtrics
